# Supplementary material for: A positive feedback loop between TAZ and miR-942-3p modulates proliferation, angiogenesis, epithelial-mesenchymal transition process, glycometabolism and ROS homeostasis in human bladder cancer
Source: J Exp Clin Cancer Res. 2021 Jan 26;40:44. doi: 10.1186/s13046-021-01846-5 (PMC7836562; doi:10.1186/s13046-021-01846-5)
Supplement: Supplementary file 2 — Additional file 2. [file 13046_2021_1846_MOESM2_ESM.xls]

miRNA_id	NC.counts	shTAZ.counts	FoldChange	log2FoldChange	pValue	qValue	Regulation	Expression_NC	Expression_shTAZ	Sequence	Length
hsa-miR-1-3p	7856	1990	0.287799101	-1.79686601	0	0	Down	325.2140758	93.59631861	TGGAATGTAAAGAAGTATGTAT	22
hsa-miR-10396b-3p	0	6	282.1999556	8.140573951	0.024088419	0.1130136	Up	0	0.282199956	GGCCCCGGGCCCTCGACCGGAC	22
hsa-miR-10399-3p	14	59	4.78808451	2.259448616	1.05E-06	9.91E-06	Up	0.579556652	2.77496623	CTCTCGGACAAGCTGTAGGTC	21
hsa-miR-10399-5p	30	110	4.165904037	2.058629607	5.50E-10	6.44E-09	Up	1.241907112	5.173665853	AATTACAGATTGTCTCAGAGA	21
hsa-miR-10b-3p	83	156	2.13542507	1.094523276	0.000165069	0.001261775	Up	3.435943011	7.337198846	ACAGATTCGATTCTAGGGGAAT	22
hsa-miR-10b-5p	6121	10838	2.011706404	1.008419768	4.19E-175	1.56E-173	Up	253.3904478	509.7471865	TACCCTGTAGAACCGAATTTGTG	23
hsa-miR-1185-2-3p	1	9	10.22540082	3.35408549	0.02059272	0.1027669	Up	0.041396904	0.423299933	ATATACAGGGGGAGACTCTCAT	22
hsa-miR-1229-3p	8	21	2.982408572	1.576477912	0.039404883	0.1734479	Up	0.33117523	0.987699845	CTCTCACCACTGCCCTCCCACAG	23
hsa-miR-1247-5p	20	6	0.340846694	-1.552805105	0.002071351	0.01346808	Down	0.827938075	0.282199956	ACCCGTCCCGTTCGTCCCCGGA	22
hsa-miR-1257	66	18	0.309860631	-1.690308629	2.97E-09	3.33E-08	Down	2.732195647	0.846599867	AGTGAATGATGGGTTCTGACC	21
hsa-miR-1266-5p	6	1	0.189359274	-2.400802012	0.046524145	0.1869316	Down	0.248381422	0.047033326	CCTCAGGGCTGTAGAACAGGGCT	23
hsa-miR-1272	4	0	0.006039099	-7.371450961	0.044951986	0.1838504	Down	0.165587615	0	GATGATGATGGCAGCAAATTCTGAAA	26
hsa-miR-1276	3	14	5.302059683	2.40655291	0.01605904	0.08277801	Up	0.124190711	0.658466563	TAAAGAGCCCTGTGGAGACA	20
hsa-miR-1283	13	56	4.894208939	2.291075693	1.54E-06	1.44E-05	Up	0.538159749	2.633866252	TCTACAAAGGAAAGCGCTTTCT	22
hsa-miR-1287-5p	48	93	2.201301565	1.138356799	0.002270106	0.01451941	Up	1.98705138	4.374099312	TGCTGGATCAGTGGTTCGAGTC	22
hsa-miR-1289	6	1	0.189359274	-2.400802012	0.046524145	0.1869316	Down	0.248381422	0.047033326	TGGAGTCCAGGAATCTGCATTTT	23
hsa-miR-129-5p	17	39	2.606474718	1.382099866	0.013484861	0.0711474	Up	0.703747364	1.834299711	CTTTTTGCGGTCTGGGCTTGC	21
hsa-miR-1291	0	6	282.1999556	8.140573951	0.024088419	0.1130136	Up	0	0.282199956	TGGCCCTGACTGAAGACCAGCAGT	24
hsa-miR-1301-3p	132	381	3.279358343	1.713413557	1.10E-22	1.87E-21	Up	5.464391294	17.91969718	TTGCAGCTGCCTGGGAGTGACTTC	24
hsa-miR-1305	8	2	0.284038912	-1.815839511	0.039968688	0.1749467	Down	0.33117523	0.094066652	TTTTCAACTCTAATGGGAGAGA	22
hsa-miR-1322	9	2	0.252479033	-1.985764513	0.02210533	0.1075747	Down	0.372572134	0.094066652	GATGATGCTGCTGATGCTG	19
hsa-miR-133a-3p	149	38	0.289757816	-1.787080518	3.14E-20	5.07E-19	Down	6.168138658	1.787266385	TTTGGTCCCCTTCAACCAGCTG	22
hsa-miR-133a-5p	22	7	0.361504069	-1.467916208	0.001696225	0.011168	Down	0.910731882	0.329233282	AGCTGGTAAAATGGAACCAAAT	22
hsa-miR-133b	18	5	0.315598791	-1.663836418	0.002489243	0.01585628	Down	0.745144267	0.23516663	TTTGGTCCCCTTCAACCAGCTA	22
hsa-miR-134-5p	32	57	2.023777245	1.017050503	0.04060449	0.1767423	Up	1.32470092	2.680899578	TGTGACTGGTTGACCAGAGGGG	22
hsa-miR-135b-3p	6	22	4.165904037	2.058629607	0.00672656	0.03897424	Up	0.248381422	1.034733171	ATGTAGGGCTAAAAGCCATGGG	22
hsa-miR-135b-5p	195	728	4.241647747	2.084624815	4.02E-59	9.27E-58	Up	8.07239623	34.24026128	TATGGCTTTTCATTCCTATGTGA	23
hsa-miR-139-3p	5	0	0.004831279	-7.693379056	0.021042273	0.1030414	Down	0.206984519	0	TGGAGACGCGGCCCTGTTGGAGT	23
hsa-miR-141-3p	38	9	0.269089495	-1.893842023	1.97E-06	1.81E-05	Down	1.573082342	0.423299933	TAACACTGTCTGGTAAAGATGG	22
hsa-miR-146b-5p	698	3587	5.838668057	2.545639293	0	0	Up	28.89503881	168.7085401	TGAGAACTGAATTCCATAGGCTG	23
hsa-miR-147b-3p	130	375	3.277372057	1.712539461	2.48E-22	4.19E-21	Up	5.381597487	17.63749723	GTGTGCGGAAATGCTTCTGCT	21
hsa-miR-147b-5p	94	256	3.094211122	1.629571637	2.17E-14	2.99E-13	Up	3.891308952	12.04053144	TGGAAACATTTCTGCACAAACT	22
hsa-miR-149-5p	814	2656	3.707161421	1.890314936	8.50E-178	3.25E-176	Up	33.69707965	124.9205137	TCTGGCTCCGTGTCTTCACTCCC	23
hsa-miR-151b	8	91	12.92377048	3.691955129	5.67E-17	8.22E-16	Up	0.33117523	4.28003266	TCGAGGAGCTCACAGTCT	18
hsa-miR-15a-3p	5	0	0.004831279	-7.693379056	0.021042273	0.1030414	Down	0.206984519	0	CAGGCCATATTGTGCTGCCTCA	22
hsa-miR-181a-2-3p	1890	634	0.381123111	-1.391671	2.95E-181	1.16E-179	Down	78.24014808	29.81912864	ACCACTGACCGTTGACTGTACC	22
hsa-miR-181a-5p	23953	56268	2.668943594	1.416268816	0	0	Up	991.5800354	2646.471184	AACATTCAACGCTGTCGGTGAGT	23
hsa-miR-181b-2-3p	8	0	0.00301955	-8.371450961	0.002158361	0.01391832	Down	0.33117523	0	CTCACTGATCAATGAATGCA	20
hsa-miR-181c-3p	50	91	2.067803277	1.048098939	0.006778353	0.03897424	Up	2.069845187	4.28003266	AACCATCGACCGTTGAGTGGAC	22
hsa-miR-181c-5p	18	70	4.41838307	2.143518504	3.34E-07	3.29E-06	Up	0.745144267	3.292332815	AACATTCAACCTGTCGGTGAGT	22
hsa-miR-181d-5p	739	1496	2.299984908	1.201624395	1.09E-39	2.23E-38	Up	30.59231187	70.3618556	AACATTCATTGTTGTCGGTGGGT	23
hsa-miR-182-3p	72	142	2.240751414	1.163982607	0.000100782	0.000797606	Up	2.98057707	6.678732283	TGGTTCTAGACTTGCCAACTA	21
hsa-miR-182-5p	11325	29455	2.955007909	1.563161992	0	0	Up	468.8199349	1385.366615	TTTGGCAATGGTAGAACTCACACT	24
hsa-miR-183-5p	11811	21236	2.04279073	1.030541417	0	0	Up	488.9388301	998.7997095	TATGGCACTGGTAGAATTCACT	22
hsa-miR-186-5p	3990	8096	2.305342384	1.204981032	4.23E-208	1.84E-206	Up	165.1736459	380.7818068	CAAAGAATTCTCCTTTTGGGCT	22
hsa-miR-18b-5p	3	14	5.302059683	2.40655291	0.01605904	0.08277801	Up	0.124190711	0.658466563	TAAGGTGCATCTAGTGCAGTTAG	23
hsa-miR-1910-5p	1	13	14.7700234	3.884600207	0.00219146	0.01407384	Up	0.041396904	0.611433237	CCAGTCCTGTGCCTGCCGCCT	21
hsa-miR-193b-3p	197	348	2.007016066	1.005052165	5.09E-07	4.96E-06	Up	8.155190037	16.36759742	AACTGGCCCTCAAAGTCCCGCT	22
hsa-miR-203a-3p	90	350	4.41838307	2.143518504	1.35E-30	2.52E-29	Up	3.725721337	16.46166408	GTGAAATGTTTAGGACCACTAG	22
hsa-miR-206	468	88	0.213636104	-2.226772612	7.17E-75	1.78E-73	Down	19.37375095	4.138932682	TGGAATGTAAGGAAGTGTGTGG	22
hsa-miR-20b-5p	5	19	4.317391456	2.110159907	0.010477409	0.05720592	Up	0.206984519	0.893633193	CAAAGTGCTCATAGTGCAGGTAG	23
hsa-miR-2110	31	75	2.748763661	1.458782869	0.000249058	0.001858449	Up	1.283304016	3.527499445	TTGGGGAAACGGCCGCTGAGTG	22
hsa-miR-212-5p	11	30	3.098606308	1.631619466	0.01012153	0.05545607	Up	0.455365941	1.410999778	ACCTTGGCTCTAGACTGCTTACT	23
hsa-miR-215-5p	6	20	3.787185488	1.921126083	0.015269346	0.07922869	Up	0.248381422	0.940666519	ATGACCTATGAATTGACAGAC	21
hsa-miR-219a-1-3p	23	7	0.345786501	-1.532046545	0.001013453	0.00687481	Down	0.952128786	0.329233282	AGAGTTGAGTCTGGACGTCCCG	22
hsa-miR-221-5p	123	417	3.851844753	1.945549557	7.67E-31	1.45E-29	Up	5.09181916	19.61289691	ACCTGGCATACAATGTAGATTT	22
hsa-miR-222-3p	1916	5222	3.096557821	1.630665385	1.90E-262	9.93E-261	Up	79.31646757	245.608028	AGCTACATCTGGCTACTGGGT	21
hsa-miR-222-5p	28	72	2.921543091	1.546730568	0.000134707	0.001044976	Up	1.159113305	3.386399467	CTCAGTAGCCAGTGTAGATCCT	22
hsa-miR-2355-3p	40	93	2.641561878	1.401391205	9.23E-05	0.000734325	Up	1.65587615	4.374099312	ATTGTCCTTGCTGTTTGGAGAT	22
hsa-miR-2355-5p	1	10	11.36155646	3.506088584	0.011855668	0.06406149	Up	0.041396904	0.470333259	ATCCCCAGATACAATGGACAA	21
hsa-miR-25-5p	94	40	0.483470488	-1.048500268	5.18E-08	5.45E-07	Down	3.891308952	1.881333037	AGGCGGAGACTTGGGCAATTG	21
hsa-miR-26a-1-3p	67	23	0.39002358	-1.358366746	1.12E-07	1.15E-06	Down	2.773592551	1.081766496	CCTATTCTTGGTTACTTGCACG	22
hsa-miR-296-5p	5	0	0.004831279	-7.693379056	0.021042273	0.1030414	Down	0.206984519	0	AGGGCCCCCCCTCAATCCTGT	21
hsa-miR-301a-3p	73	194	3.01937254	1.594248772	8.04E-11	9.70E-10	Up	3.021973973	9.124465231	CAGTGCAATAGTATTGTCAAAGC	23
hsa-miR-301b-3p	237	460	2.205196613	1.140907291	7.69E-12	9.41E-11	Up	9.811066187	21.63532993	CAGTGCAATGATATTGTCAAAGC	23
hsa-miR-30a-3p	30583	11476	0.426332348	-1.229949571	0	0	Down	1266.041507	539.7544484	CTTTCAGTCGGATGTTTGCAGC	22
hsa-miR-30c-2-3p	2737	932	0.386882376	-1.370033086	4.38E-257	2.22E-255	Down	113.3033255	43.83505977	CTGGGAGAAGGCTGTTTACTCT	22
hsa-miR-30d-5p	5287	12107	2.601747004	1.37948068	0	0	Up	218.8654301	569.4324771	TGTAAACATCCCCGACTGGAAG	22
hsa-miR-31-5p	1125	2485	2.509641583	1.327481339	1.38E-81	3.48E-80	Up	46.57151671	116.8778149	AGGCAAGATGCTGGCATAGCT	21
hsa-miR-3142	12	4	0.378718549	-1.400802012	0.025680181	0.1183554	Down	0.496762845	0.188133304	AAGGCCTTTCTGAACCTTCAGA	22
hsa-miR-3145-3p	0	8	376.2666075	8.55561145	0.006814896	0.03897424	Up	0	0.376266607	AGATATTTTGAGTGTTTGGAATTG	24
hsa-miR-3145-5p	0	8	376.2666075	8.55561145	0.006814896	0.03897424	Up	0	0.376266607	AACTCCAAACACTCAAAACTCA	22
hsa-miR-3155a	8	1	0.142019456	-2.815839511	0.012490541	0.06657373	Down	0.33117523	0.047033326	CCAGGCTCTGCAGTGGGAACT	21
hsa-miR-3163	0	5	235.1666297	7.877539545	0.045287966	0.1838504	Up	0	0.23516663	TATAAAATGAGGGCAGTAAGAC	22
hsa-miR-3175	3	12	4.544622586	2.184160489	0.040198095	0.1754608	Up	0.124190711	0.564399911	CGGGGAGAGAACGCAGTGACGT	22
hsa-miR-3183	15	2	0.15148742	-2.722730107	0.000510091	0.003552501	Down	0.620953556	0.094066652	GCCTCTCTCGGAGTCGCTCGGA	22
hsa-miR-3200-3p	0	8	376.2666075	8.55561145	0.006814896	0.03897424	Up	0	0.376266607	CACCTTGCGCTACTCAGGTCTG	22
hsa-miR-323a-3p	32	80	2.840389116	1.506088584	8.98E-05	0.000717725	Up	1.32470092	3.762666075	CACATTACACGGTCGACCTCT	21
hsa-miR-335-5p	9	1	0.126239516	-2.985764513	0.006384286	0.03810717	Down	0.372572134	0.047033326	TCAAGAGCAATAACGAAAAATGT	23
hsa-miR-33b-3p	94	41	0.49555725	-1.012876358	9.27E-08	9.62E-07	Down	3.891308952	1.928366363	CAGTGCCTCGGCAGTGCAGCCC	22
hsa-miR-340-3p	319	603	2.147654717	1.102762067	6.29E-14	8.49E-13	Up	13.20561229	28.36109554	TCCGTCTCAGTTACTTTATAGC	22
hsa-miR-3605-3p	10	28	3.18123581	1.669587316	0.011141935	0.06062296	Up	0.413969037	1.316933126	CCTCCGTGTTACCTGTCCTCTAG	23
hsa-miR-3605-5p	11	31	3.201893185	1.678925181	0.007120671	0.04042787	Up	0.455365941	1.458033104	TGAGGATGGATAGCAAGGAAGCC	23
hsa-miR-361-3p	599	2459	4.664118088	2.221604316	5.97E-217	2.67E-215	Up	24.79674534	115.6549485	TCCCCCAGGTGTGATTCTGATTT	23
hsa-miR-3614-5p	4	19	5.396739321	2.432088002	0.004201334	0.0260217	Up	0.165587615	0.893633193	CCACTTGGATCTGAAGGCTGCCC	23
hsa-miR-362-3p	2	11	6.248856055	2.643592108	0.024313419	0.1133903	Up	0.082793807	0.517366585	AACACACCTATTCAAGGATTCA	22
hsa-miR-3620-5p	0	5	235.1666297	7.877539545	0.045287966	0.1838504	Up	0	0.23516663	GTGGGCTGGGCTGGGCTGGGCC	22
hsa-miR-363-3p	95	196	2.344068492	1.229014725	1.00E-06	9.50E-06	Up	3.932705856	9.218531883	AATTGCACGGTATCCATCTGTA	22
hsa-miR-3679-3p	0	5	235.1666297	7.877539545	0.045287966	0.1838504	Up	0	0.23516663	CTTCCCCCCAGTAATCTTCATC	22
hsa-miR-369-3p	41	110	3.048222466	1.607968198	8.43E-07	8.10E-06	Up	1.697273053	5.173665853	AATAATACATGGTTGATCTTT	21
hsa-miR-369-5p	16	34	2.414330749	1.27162333	0.036525782	0.162602	Up	0.66235046	1.599133082	AGATCGACCGTGTTATATTCGC	22
hsa-miR-372-3p	11	1	0.103286877	-3.27527113	0.001634453	0.01085249	Down	0.455365941	0.047033326	AAAGTGCTGCGACATTTGAGCGT	23
hsa-miR-378d	14	53	4.301160662	2.104726021	1.30E-05	0.000113749	Up	0.579556652	2.492766274	ACTGGACTTGGAGTCAGAAA	20
hsa-miR-379-3p	5	27	6.135240491	2.617119896	0.000275937	0.002030017	Up	0.206984519	1.2698998	TATGTAACATGGTCCACTAACT	22
hsa-miR-382-5p	16	48	3.408466939	1.76912299	0.000389027	0.002770932	Up	0.66235046	2.257599645	GAAGTTGTTCGTGGTGGATTCG	22
hsa-miR-3918	1	9	10.22540082	3.35408549	0.02059272	0.1027669	Up	0.041396904	0.423299933	ACAGGGCCGCAGATGGAGACT	21
hsa-miR-3929	39	14	0.407850745	-1.293886808	8.63E-05	0.000693779	Down	1.614479246	0.658466563	GAGGCTGATGTGAGTAGACCACT	23
hsa-miR-410-3p	15	47	3.559954359	1.831858745	0.000287839	0.002107681	Up	0.620953556	2.210566319	AATATAACACAGATGGCCTGT	21
hsa-miR-412-5p	6	19	3.597826214	1.847125502	0.022718514	0.1102164	Up	0.248381422	0.893633193	TGGTCGACCAGTTGGAAAGTAAT	23
hsa-miR-4306	0	6	282.1999556	8.140573951	0.024088419	0.1130136	Up	0	0.282199956	TGGAGAGAAAGGCAGTA	17
hsa-miR-4421	6	0	0.004026066	-7.956413462	0.009850005	0.05415774	Down	0.248381422	0	ACCTGTCTGTGGAAAGGAGCTA	22
hsa-miR-4424	4	0	0.006039099	-7.371450961	0.044951986	0.1838504	Down	0.165587615	0	AGAGTTAACTCAAAATGGACTA	22
hsa-miR-4435	5	0	0.004831279	-7.693379056	0.021042273	0.1030414	Down	0.206984519	0	ATGGCCAGAGCTCACACAGAGG	22
hsa-miR-4470	14	4	0.324615899	-1.623194433	0.00886021	0.04976326	Down	0.579556652	0.188133304	TGGCAAACGTGGAAGCCGAGA	21
hsa-miR-4479	8	2	0.284038912	-1.815839511	0.039968688	0.1749467	Down	0.33117523	0.094066652	CGCGCGGCCGTGCTCGGAGCAG	22
hsa-miR-4515	0	6	282.1999556	8.140573951	0.024088419	0.1130136	Up	0	0.282199956	AGGACTGGACTCCCGGCAGCCC	22
hsa-miR-451a	746	255	0.388364196	-1.364517895	3.80E-71	9.03E-70	Down	30.88209019	11.99349811	AAACCGTTACCATTACTGAGTT	22
hsa-miR-454-3p	557	1327	2.706783739	1.436579627	1.19E-52	2.59E-51	Up	23.05807539	62.41322351	TAGTGCAATATTGCTTATAGGGT	23
hsa-miR-4652-5p	17	7	0.467828796	-1.09594743	0.019297972	0.09786383	Down	0.703747364	0.329233282	AGGGGACTGGTTAATAGAACTA	22
hsa-miR-4677-3p	35	76	2.467080832	1.302804985	0.00116018	0.007769239	Up	1.448891631	3.574532771	TCTGTGAGACCAAAGAACTACT	22
hsa-miR-4683	3	28	10.60411937	3.40655291	1.28E-05	0.000112518	Up	0.124190711	1.316933126	TGGAGATCCAGTGCTCGCCCGAT	23
hsa-miR-4747-3p	4	0	0.006039099	-7.371450961	0.044951986	0.1838504	Down	0.165587615	0	AAGGCCCGGGCTTTCCTCCCAG	22
hsa-miR-4755-5p	13	5	0.436982941	-1.194351134	0.032874804	0.1484577	Down	0.538159749	0.23516663	TTTCCCTTCAGAGCCTGGCTTT	22
hsa-miR-4758-3p	0	8	376.2666075	8.55561145	0.006814896	0.03897424	Up	0	0.376266607	TGCCCCACCTGCTGACCACCCTC	23
hsa-miR-4787-3p	9	23	2.903508874	1.537797443	0.035165536	0.1578923	Up	0.372572134	1.081766496	GATGCGCCGCCCACTGCCCCGCGC	24
hsa-miR-4791	92	184	2.272311293	1.184160489	5.98E-06	5.38E-05	Up	3.808515144	8.654131972	TGGATATGATGACTGAAA	18
hsa-miR-483-3p	37	15	0.46060364	-1.118402281	0.000424615	0.002970411	Down	1.531685439	0.705499889	TCACTCCTCTCCTCCCGTCTT	21
hsa-miR-483-5p	45	5	0.126239516	-2.985764513	1.51E-10	1.80E-09	Down	1.862860668	0.23516663	AAGACGGGAGGAAAGAAGGGAG	22
hsa-miR-491-3p	0	6	282.1999556	8.140573951	0.024088419	0.1130136	Up	0	0.282199956	CTTATGCAAGATTCCCTTCTAC	22
hsa-miR-493-3p	4	0	0.006039099	-7.371450961	0.044951986	0.1838504	Down	0.165587615	0	TGAAGGTCTACTGTGTGCCAGG	22
hsa-miR-494-3p	4	0	0.006039099	-7.371450961	0.044951986	0.1838504	Down	0.165587615	0	TGAAACATACACGGGAAACCTC	22
hsa-miR-497-5p	8	26	3.692505851	1.884600207	0.006174793	0.03707241	Up	0.33117523	1.222866474	CAGCAGCACACTGTGGTTTGT	21
hsa-miR-4999-5p	6	0	0.004026066	-7.956413462	0.009850005	0.05415774	Down	0.248381422	0	TGCTGTATTGTCAGGTAGTGA	21
hsa-miR-5001-5p	0	5	235.1666297	7.877539545	0.045287966	0.1838504	Up	0	0.23516663	AGGGCTGGACTCAGCGGCGGAGCT	24
hsa-miR-505-3p	67	180	3.052358453	1.609924395	2.58E-10	3.07E-09	Up	2.773592551	8.465998668	CGTCAACACTTGCTGGTTTCCT	22
hsa-miR-509-3-5p	0	5	235.1666297	7.877539545	0.045287966	0.1838504	Up	0	0.23516663	TACTGCAGACGTGGCAATCATG	22
hsa-miR-5100	13	4	0.349586353	-1.516279229	0.01517984	0.07902594	Down	0.538159749	0.188133304	TTCAGATCCCAGCGGTGCCTCT	22
hsa-miR-516a-5p	100	677	7.691773726	2.943316323	5.80E-91	1.54E-89	Up	4.139690374	31.84156166	TTCTCGAGGAAAGAAGCACTTTC	23
hsa-miR-519a-3p	27	85	3.576786294	1.838663923	8.55E-07	8.17E-06	Up	1.117716401	3.997832704	AAAGTGCATCCTTTTAGAGTGT	22
hsa-miR-521	1	11	12.49771211	3.643592108	0.006786006	0.03897424	Up	0.041396904	0.517366585	AACGCACTTCCCTTTAGAGTGT	22
hsa-miR-522-3p	231	422	2.075574384	1.053510636	3.56E-09	3.96E-08	Up	9.562684765	19.84806354	AAAATGGTTCCCTTTAGAGTGT	22
hsa-miR-548ad-5p>hsa-miR-548ae-5p	0	11	517.3665853	9.015043069	0.0010255	0.006926545	Up	0	0.517366585	AAAAGTAATTGTGGTTTTTG	20
hsa-miR-550a-3-5p	13	1	0.087396588	-3.516279229	0.000409752	0.002879287	Down	0.538159749	0.047033326	AGTGCCTGAGGGAGTAAGAG	20
hsa-miR-550a-3p	70	29	0.470693054	-1.087141533	1.67E-06	1.56E-05	Down	2.897783262	1.363966452	TGTCTTACTCCCTCAGGCACAT	22
hsa-miR-550b-2-5p	8	0	0.00301955	-8.371450961	0.002158361	0.01391832	Down	0.33117523	0	ATGTGCCTGAGGGAGTAAGACA	22
hsa-miR-556-3p	16	2	0.142019456	-2.815839511	0.000265355	0.001961373	Down	0.66235046	0.094066652	ATATTACCATTAGCTCATCTTT	22
hsa-miR-573	29	10	0.391777809	-1.351892411	0.000543602	0.003769133	Down	1.200510209	0.470333259	CTGAAGTGATGTGTAACTGATCAG	24
hsa-miR-584-5p	241	558	2.63060104	1.395392464	9.33E-22	1.56E-20	Up	9.976653802	26.24459587	TTATGGTTTGCCTGGGACTGAG	22
hsa-miR-597-5p	0	5	235.1666297	7.877539545	0.045287966	0.1838504	Up	0	0.23516663	TGTGTCACTCGATGACCACTGT	22
hsa-miR-618	74	244	3.746242942	1.905444461	4.75E-18	7.23E-17	Up	3.063370877	11.47613153	AAACTCTACTTGTCCTTCTGAGT	23
hsa-miR-628-5p	161	319	2.251140691	1.170656225	3.99E-09	4.37E-08	Up	6.664901503	15.00363097	ATGCTGACATATTTACTAGAGG	22
hsa-miR-641	24	50	2.36699093	1.243054178	0.013062477	0.06915169	Up	0.99352569	2.351666297	AAAGACATAGGATAGAGTCACCTC	24
hsa-miR-6500-3p	37	13	0.399189822	-1.324853159	0.000107612	0.000838942	Down	1.531685439	0.611433237	ACACTTGTTGGGATGACCTGC	21
hsa-miR-6505-5p	11	4	0.413147508	-1.27527113	0.042833733	0.1838504	Down	0.455365941	0.188133304	TTGGAATAGGGGATATCTCAGC	22
hsa-miR-6509-3p	0	5	235.1666297	7.877539545	0.045287966	0.1838504	Up	0	0.23516663	TTCCACTGCCACTACCTAATTT	22
hsa-miR-6511b-5p	0	5	235.1666297	7.877539545	0.045287966	0.1838504	Up	0	0.23516663	CTGCAGGCAGAAGTGGGGCTGACA	24
hsa-miR-653-3p	4	14	3.976544763	1.991515411	0.038732019	0.1709664	Up	0.165587615	0.658466563	TTCACTGGAGTTTGTTTCAATA	22
hsa-miR-654-3p	99	186	2.134595457	1.09396268	3.90E-05	0.000323208	Up	4.098293471	8.748198624	TATGTCTGCTGACCATCACCTT	22
hsa-miR-654-5p	7	22	3.570774889	1.836237185	0.014325692	0.07507812	Up	0.289778326	1.034733171	TGGTGGGCCGCAGAACATGTGC	22
hsa-miR-655-3p	0	6	282.1999556	8.140573951	0.024088419	0.1130136	Up	0	0.282199956	ATAATACATGGTTAACCTCTTT	22
hsa-miR-6735-5p	10	2	0.227231129	-2.137767606	0.012071006	0.06477831	Down	0.413969037	0.094066652	CAGGGCAGAGGGCACAGGAATCTGA	25
hsa-miR-6737-3p	5	0	0.004831279	-7.693379056	0.021042273	0.1030414	Down	0.206984519	0	TCTGTGCTTCACCCCTACCCAG	22
hsa-miR-6758-3p	4	0	0.006039099	-7.371450961	0.044951986	0.1838504	Down	0.165587615	0	ACTCATTCTCCTCTGTCCAG	20
hsa-miR-6815-5p	44	19	0.490612666	-1.027343616	0.00024262	0.001819072	Down	1.821463765	0.893633193	TAGGTGGCGCCGGAGGAGTCATT	23
hsa-miR-6852-5p	0	6	282.1999556	8.140573951	0.024088419	0.1130136	Up	0	0.282199956	CCCTGGGGTTCTGAGGACATG	21
hsa-miR-6854-5p	0	7	329.2332815	8.362966372	0.012812497	0.06805824	Up	0	0.329233282	AAGCTCAGGTTTGAGAACTGCTGA	24
hsa-miR-6855-5p	0	5	235.1666297	7.877539545	0.045287966	0.1838504	Up	0	0.23516663	TTGGGGTTTGGGGTGCAGACATTGC	25
hsa-miR-6857-3p	6	0	0.004026066	-7.956413462	0.009850005	0.05415774	Down	0.248381422	0	TGACTGAGCTTCTCCCCACAG	21
hsa-miR-7112-3p	4	0	0.006039099	-7.371450961	0.044951986	0.1838504	Down	0.165587615	0	TGCATCACAGCCTTTGGCCCTAG	23
hsa-miR-7702	4	0	0.006039099	-7.371450961	0.044951986	0.1838504	Down	0.165587615	0	CTTAGACTGCCAGACTCCCTGA	22
hsa-miR-7705	6	22	4.165904037	2.058629607	0.00672656	0.03897424	Up	0.248381422	1.034733171	AATAGCTCAGAATGTCAGTTCTG	23
hsa-miR-7974	1818	705	0.440588411	-1.182496548	1.14E-145	3.72E-144	Down	75.25957101	33.15849478	AGGCTGTGATGCTCTCCTGAGCCC	24
hsa-miR-885-5p	4	0	0.006039099	-7.371450961	0.044951986	0.1838504	Down	0.165587615	0	TCCATTACACTACCCTGCCTCT	22
hsa-miR-92b-5p	20	43	2.44273464	1.288497149	0.016514179	0.08484498	Up	0.827938075	2.022433015	AGGGACGGGACGCGGTGCAGTG	22
hsa-miR-939-5p	13	5	0.436982941	-1.194351134	0.032874804	0.1484577	Down	0.538159749	0.23516663	TGGGGAGCTGAGGCTCTGGGGGTG	24
hsa-miR-942-3p	30	10	0.378718549	-1.400802012	0.000332911	0.002425798	Down	1.241907112	0.470333259	CACATGGCCGAAACAGAGAAGT	22
hsa-miR-95-3p	72	21	0.33137873	-1.59344709	1.90E-09	2.17E-08	Down	2.98057707	0.987699845	TTCAACGGGTATTTATTGAGCA	22			CACATGGCCGAAACAGAGAAGT
novel102_mature	13	1	0.087396588	-3.516279229	0.000409752	0.002879287	Down	0.538159749	0.047033326	AAAAGGGAAGATTGTGGTT	19			TGAAGAGACAAAGCCGGTACAC
novel151_mature	7	28	4.544622586	2.184160489	0.001228972	0.00819489	Up	0.289778326	1.316933126	CCGGCTTGGTCCTGCGGTCCC	21
novel154_mature	6	1	0.189359274	-2.400802012	0.046524145	0.1869316	Down	0.248381422	0.047033326	TTTGGTTTAGCTGTTGTT	18
novel158_mature	2	12	6.816933879	2.76912299	0.014741293	0.07699869	Up	0.082793807	0.564399911	AGCGAGGGTTCCGCCGGCCACC	22
novel166_mature	4	0	0.006039099	-7.371450961	0.044951986	0.1838504	Down	0.165587615	0	TTCTGACTTCAGGTGCTTAGTT	22
novel217_mature	6	1	0.189359274	-2.400802012	0.046524145	0.1869316	Down	0.248381422	0.047033326	CCAGGTGTCTTCCATTCTGTCC	22
novel228_mature	8	23	3.266447484	1.707722445	0.019248963	0.09786383	Up	0.33117523	1.081766496	TGACCTCGCCGCCCCTCTGGATG	23
novel267_mature	23	0	0.001050278	-9.895012917	2.45E-08	2.63E-07	Down	0.952128786	0	TGCTCTGATGTCTGGCTGAGC	21
novel274_mature	91	14	0.174793176	-2.516279229	1.66E-17	2.45E-16	Down	3.767118241	0.658466563	TAAGGTCTTAATTCAGTAAGAT	22
novel284_mature	12	1	0.094679637	-3.400802012	0.000820219	0.005612587	Down	0.496762845	0.047033326	GTATCCTCTGTGGCTTTT	18
novel292_mature	15	6	0.454462259	-1.137767606	0.025190842	0.1167871	Down	0.620953556	0.282199956	TGTAGGCTGATGTTGATACTGGAG	24
novel295_mature	15	6	0.454462259	-1.137767606	0.025190842	0.1167871	Down	0.620953556	0.282199956	GGGAGGCAGGATAAGGCCTGGAC	23
novel306_mature	0	5	235.1666297	7.877539545	0.045287966	0.1838504	Up	0	0.23516663	TGGGCTGTGCTCTGGGCATTTTTC	24
novel317_mature	143	35	0.278080053	-1.846427831	4.23E-20	6.76E-19	Down	5.919757235	1.646166408	AGCTGGGGATGGAAGCTGAAGCC	23
novel326_mature	18	37	2.335431051	1.223688853	0.03697758	0.1641469	Up	0.745144267	1.74023306	TGCGTCCTAGGCCCCCGGCTCT	22
novel346_mature	11	0	0.002196036	-8.83088258	0.000221389	0.001667865	Down	0.455365941	0	GATTGATTTGAATGTTTTGA	20
novel347_mature	1	8	9.089245172	3.184160489	0.035525711	0.1586005	Up	0.041396904	0.376266607	AAAGTGCTTCCTTTCAGAGGG	21
novel386_mature	10	2	0.227231129	-2.137767606	0.012071006	0.06477831	Down	0.413969037	0.094066652	TGATTTTTAGAAGTTCTAC	19
novel398_mature	8	1	0.142019456	-2.815839511	0.012490541	0.06657373	Down	0.33117523	0.047033326	TTGGGGCTGGAGGTATCCACACA	23
novel5_star	5	0	0.004831279	-7.693379056	0.021042273	0.1030414	Down	0.206984519	0	CGTGTCCAGAATGGCCAGCCAGA	23
novel65_mature	7	36	5.843086182	2.546730568	3.39E-05	0.000283888	Up	0.289778326	1.693199734	CCTCTTCCTCCAGCCTCTGAAT	22
novel73_star	0	6	282.1999556	8.140573951	0.024088419	0.1130136	Up	0	0.282199956	TGGTAGGAGCTATCAGAACTTAGT	24
novel7_mature	1	10	11.36155646	3.506088584	0.011855668	0.06406149	Up	0.041396904	0.470333259	GCCCCCAGACTGGGCTCAGTGT	22
